# Supplementary material for: PEDOT:PSS interfaces stabilised using a PEGylated crosslinker yield improved conductivity and biocompatibility
Source: Royal Society of Chemistry journal article supplement (doi:10.1039/c9tb01028a), 2019-01-01
Supplement: c9tb01028a1.pdf [file c9tb01028a1.pdf]

## Electronic supplementary information (ESI)

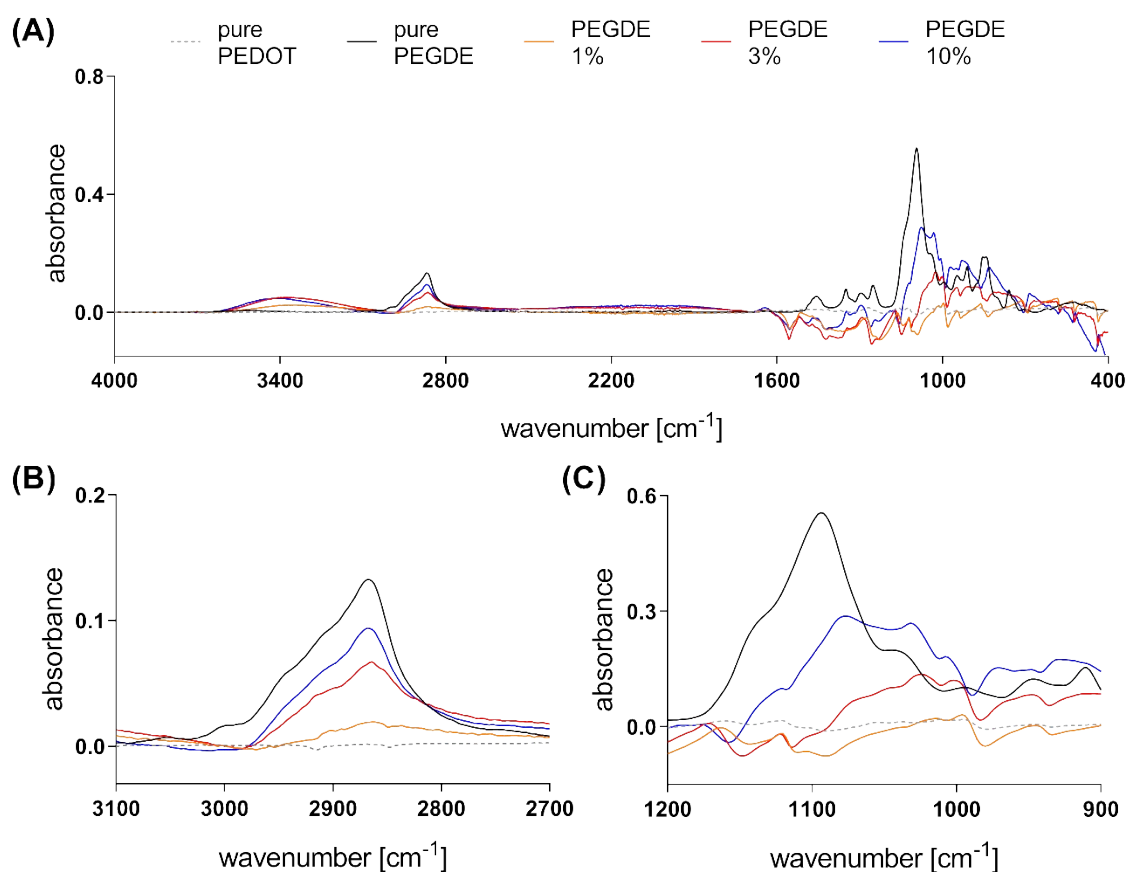

**Supporting Information 1.** FT-IR spectra of pure PEDOT:PSS, pure PEGDE and PEDOT:PSS film crosslinked with PEGDE at 1, 3 and 10 w/v%. (A) Whole spectra. (B) Detail spectra between 2700 and 3100 cm<sup>-1</sup>. (C) Detail spectra between 900 and 1200 cm<sup>-1</sup>.

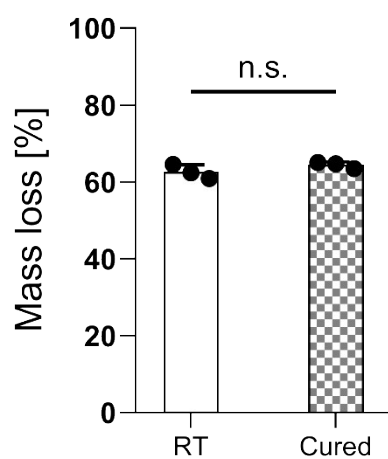

**Supporting Information 2.** Mass loss after 48 hours in distilled water in dynamic conditioning for PEDOT:PSS-PEGDE drop-casted films dried at room temperature or cured at 140 °C. Data values are presented as associated points. n.s. represents absence of statistical significance ( $p > 0.05$ ) between indicated groups using unpaired student t-test.

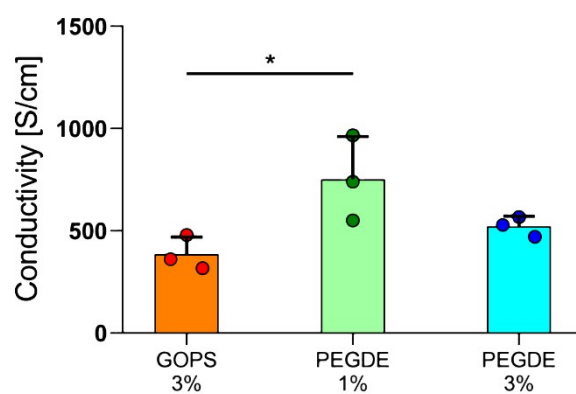

**Supporting Information 3.** Conductivity values from 4-point probe method on crosslinked PEDOT:PSS spin-coated on ITO coated glass slides. Data values are presented as associated points. \* represents statistical significance ( $p < 0.05$ ) between indicated groups using one-way ANOVA with Tukey's post-hoc test.
